# Supplementary material for: The effect of gene polymorphism on ticagrelor metabolism: an in vitro study of 22 CYP3A4 variants in Chinese Han population
Source: PeerJ. 2024 Sep 24;12:e18109. doi: 10.7717/peerj.18109 (PMC11430164; doi:10.7717/peerj.18109)
Supplement: Supplemental Information 1 — Yellow highlight is the concentration of the variant. The first column shows the variant at different concentrations. Column 2-4 show the AR-C 1249100xx concentrations determined by UHPLC-MS/MS. Column 5-7 show the calculated metabolic rates. Column 8 and Column 9 are mean and SD value of Column 5-7. [file peerj-12-18109-s001.xlsx]

## Sheet: Raw Data
variants-concentration (pmol/μL）	AR-C 1249100xx concentration			metabolic rate
*1-0.51	nM			pmol/min/nmol			mean	SD
1	182.273	191.788	178.213	476.532	501.408	465.916	481.285	18.217
2	347.586	344.064	338.842	908.72	899.514	885.861	898.032	11.5012
5	476.743	441.807	451.623	1246.39	1155.05	1180.71	1194.05	47.1053
10	514.918	529.422	523.25	1346.19	1384.11	1367.97	1366.09	19.0284
20	565.118	541.709	572.609	1477.43	1416.23	1497.02	1463.56	42.1412
50	529.624	529.71	538.789	1384.64	1384.86	1408.6	1392.7	13.7701
*2- 0.07	nM			pmol/min/nmol			mean	SD
1	13.9681	16.9579	15.6871	266.06	323.008	298.803	295.957	28.5805
2	22.4313	28.8872	26.6781	427.262	550.233	508.155	495.217	62.4981
5	45.4675	41.6908	43.0888	866.048	794.111	820.738	826.966	36.3706
10	74.4931	65.6519	70.8624	1418.92	1250.51	1349.76	1339.73	84.6486
20	112.342	113.738	112.853	2139.84	2166.43	2149.58	2151.95	13.4512
50	121.722	131.876	123.659	2318.51	2511.92	2355.4	2395.28	102.681
*10- 0.34	nM			pmol/min/nmol			mean	SD
1	176.766	198.908	187.479	693.201	780.03	735.212	736.148	43.4221
2	349.754	321.404	335.479	1371.58	1260.41	1315.6	1315.86	55.589
5	600.119	601.44	600.398	2353.41	2358.59	2354.5	2355.5	2.72882
10	829.526	800.501	813.689	3253.04	3139.22	3190.94	3194.4	56.9905
20	905.505	909.103	913.69	3551	3565.11	3583.1	3566.4	16.0865
50	840.528	956.492	889.619	3296.19	3750.95	3488.7	3511.95	228.27
*19- 0.26	nM			pmol/min/nmol			mean	SD
1	82.491	89.3335	83.417	423.031	458.12	427.779	436.31	19.0367
2	130.155	171.487	151.648	667.464	879.421	777.683	774.856	106.007
5	229.697	243.054	235.689	1177.93	1246.43	1208.66	1211.01	34.3096
10	303.945	319.721	311.733	1558.69	1639.59	1598.63	1598.97	40.4508
20	342.895	342.377	343.764	1758.43	1755.78	1762.89	1759.04	3.59469
50	332.987	295.617	321.486	1707.63	1515.99	1648.64	1624.09	98.1529
I427V-0.35	nM			pmol/min/nmol			mean	SD
1	173.779	188.478	179.82	662.014	718.013	685.027	688.351	28.1474
2	338.058	310.708	327.778	1287.84	1183.65	1248.68	1240.06	52.6278
5	543.642	483.219	510.176	2071.02	1840.83	1943.53	1951.79	115.314
10	635.366	595.833	617.469	2420.44	2269.84	2352.26	2347.52	75.4142
20	709.01	722.999	717.686	2700.99	2754.28	2734.04	2729.77	26.9006
50	637.176	640.758	638.074	2427.34	2440.98	2430.76	2433.03	7.1016
*4- 0.47	nM			pmol/min/nmol			mean	SD
1	171.388	175.246	173.688	486.206	497.152	492.731	492.03	5.50663
2	315.087	296.501	306.62	893.864	841.137	869.843	868.281	26.3982
5	508.416	523.287	515.642	1442.32	1484.5	1462.81	1463.21	21.0962
10	656.472	732.753	694.715	1862.33	2078.73	1970.82	1970.63	108.2
20	764.633	809.067	782.798	2169.17	2295.22	2220.7	2228.37	63.3752
50	669.328	666.75	668.62	1898.8	1891.49	1896.79	1895.7	3.77899
*11- 0.04	nM			pmol/min/nmol			mean	SD
1	44.0641	52.1228	48.2598	1468.8	1737.43	1608.66	1604.96	134.35
2	81.8935	83.2677	82.7499	2729.78	2775.59	2758.33	2754.57	23.1346
5	123.795	110.299	116.739	4126.48	3676.64	3891.31	3898.15	224.999
10	140.279	150.184	145.73	4675.98	5006.12	4857.66	4846.59	165.35
20	175.999	163.483	169.794	5866.62	5449.43	5659.79	5658.61	208.598
50	157.761	163.307	160.659	5258.69	5443.57	5355.3	5352.52	92.4703
*15-0.3	nM			pmol/min/nmol			mean	SD
1	100.84	102.443	101.637	448.176	455.302	451.721	451.733	3.56312
2	191.802	190.729	192.635	852.453	847.684	856.155	852.097	4.24642
5	378.721	309.903	339.798	1683.2	1377.35	1510.21	1523.59	153.368
10	460.093	451.814	455.489	2044.86	2008.06	2024.4	2025.77	18.4355
20	559.147	539.639	547.279	2485.1	2398.39	2432.35	2438.61	43.6891
50	617.72	610.801	602.676	2745.42	2714.67	2678.56	2712.88	33.4667
*16- 0.48	nM			pmol/min/nmol			mean	SD
1	122.932	117.087	119.38	341.478	325.241	331.611	332.776	8.18083
2	209.732	200.257	204.689	582.589	556.27	568.581	569.147	13.1681
5	388.778	387.254	387.365	1079.94	1075.71	1076.01	1077.22	2.36
10	539.829	509.569	524.698	1499.52	1415.47	1457.5	1457.5	42.0274
20	648.011	621.214	635.799	1800.03	1725.6	1766.11	1763.91	37.2665
50	571.752	618.136	597.237	1588.2	1717.05	1658.99	1654.75	64.5275
*5- 0.29	nM			pmol/min/nmol			mean	SD
1	89.7917	91.0614	90.5174	412.835	418.673	416.172	415.893	2.92885
2	105.666	118.104	107.368	485.823	543.007	493.645	507.492	31.0052
5	305.505	332.809	310.497	1404.62	1530.15	1427.57	1454.12	66.8431
10	468.546	488.715	478.722	2154.23	2246.96	2201.02	2200.74	46.3659
20	527.768	556.456	535.692	2426.52	2558.42	2462.95	2482.63	68.1147
50	439.333	455.932	447.689	2019.92	2096.24	2058.34	2058.17	38.1588
*9- 0.35	nM			pmol/min/nmol			mean	SD
1	121.558	131.927	126.365	463.079	502.58	481.39	482.35	19.768
2	245.772	240.005	242.369	936.274	914.306	923.31	924.63	11.0432
5	384.202	354.933	369.638	1463.63	1352.13	1408.14	1407.97	55.7502
10	499.281	437.509	467.28	1902.02	1666.7	1780.11	1782.95	117.687
20	581.341	573.757	577.639	2214.63	2185.74	2200.53	2200.3	14.4484
50	538.709	520.241	528.219	2052.22	1981.87	2012.26	2015.45	35.2855
*17- 0.11	nM			pmol/min/nmol			mean	SD
1	5.27363	4.95831	5.17894	63.9228	60.1008	62.775	62.2662	1.96115
2	5.51118	5.91161	5.89641	66.8022	71.6559	71.4716	69.9766	2.75066
5	9.35544	9.46417	8.89057	113.399	114.717	107.764	111.96	3.69295
10	14.4911	14.4239	13.9862	175.65	174.836	169.53	173.338	3.32345
20	19.877	21.0366	20.4862	240.934	254.989	248.318	248.08	7.03065
50	20.4822	21.4966	20.5829	248.269	260.565	249.49	252.775	6.77458
*23- 0.29	nM			pmol/min/nmol			mean	SD
1	133.574	146.669	139.469	614.135	674.342	641.236	643.238	30.153
2	226.405	241.226	232.579	1040.94	1109.08	1069.33	1073.12	34.229
5	363.489	419.89	384.781	1671.21	1930.53	1769.11	1790.28	130.949
10	580.663	578.393	579.199	2669.72	2659.28	2662.98	2663.99	5.29236
20	603.797	595.328	593.568	2776.08	2737.14	2729.05	2747.42	25.1456
50	623.032	609.512	619.613	2864.51	2802.35	2848.79	2838.55	32.3201
L22V-0.59	nM			pmol/min/nmol			mean	SD
1	140.965	115.108	127.258	318.566	260.131	287.589	288.762	29.2347
2	232.537	267.728	248.459	525.508	605.036	561.489	564.011	39.8239
5	387.973	438.171	406.992	876.775	990.217	919.757	928.916	57.2727
10	469.686	498.904	488.904	1061.44	1127.47	1104.87	1097.92	33.5579
20	570.008	517.065	543.663	1288.15	1168.51	1228.62	1228.43	59.8234
50	534.732	548.88	548.84	1208.43	1240.41	1240.32	1229.72	18.433
I335T-0.25	nM			pmol/min/nmol			mean	SD
1	86.9088	134.307	109.333	463.513	716.306	583.107	587.642	126.457
2	210.955	189.879	206.812	1125.09	1012.69	1103	1080.26	59.5522
5	358.999	362.909	360.609	1914.66	1935.51	1923.25	1924.47	10.4799
10	387.152	432.498	412.674	2064.81	2306.66	2200.93	2190.8	121.24
20	499.598	422.468	459.349	2664.52	2253.16	2449.86	2455.85	205.744
50	426.857	446.906	434.794	2276.57	2383.5	2318.9	2326.32	53.8488
F113I-0.23	nM			pmol/min/nmol			mean	SD
1	68.311	67.0638	67.1448	396.006	388.776	389.245	394.139	156.07
2	109.598	122.051	118.562	635.353	707.544	687.315	723.74	292.706
5	178.9	168.389	173.427	1037.1	976.17	1005.38	1072.05	166.489
10	213.888	217.269	215.979	1239.93	1259.53	1252.05	1244.09	349.556
20	236.874	241.866	238.736	1373.18	1402.12	1383.98	1419.99	75.2214
50	240.808	228.76	234.183	1395.99	1326.14	1357.58	1392.7	13.7701
H324Q-0.36	nM			pmol/min/nmol			mean	SD
1	139.073	124.246	134.781	515.084	460.169	499.191	491.481	28.2572
2	218.863	224.967	222.897	810.603	833.211	825.543	823.119	11.4969
5	353.636	350.708	351.271	1309.76	1298.92	1301	1303.23	5.75523
10	432.33	482.036	459.457	1601.22	1785.32	1701.69	1696.08	92.177
20	499.792	494.801	495.306	1851.08	1832.59	1834.47	1839.38	10.1761
50	449.352	471.134	462.132	1664.27	1744.94	1711.6	1706.94	40.5394
A370S-0.3	nM			pmol/min/nmol			mean	SD
1	157.364	197.493	171.253	699.397	877.748	761.125	779.423	90.5724
2	319.757	316.669	318.814	1421.14	1407.42	1416.95	1415.17	7.03292
5	496.391	500.43	498.682	2206.18	2224.13	2216.36	2215.56	9.00339
10	611.343	699.503	656.542	2717.08	3108.9	2917.97	2914.65	195.933
20	763.599	780.116	773.676	3393.77	3467.18	3438.56	3433.17	36.9996
50	749.074	718.192	733.209	3329.22	3191.97	3258.71	3259.96	68.6344
*3- 0.24	nM			pmol/min/nmol			mean	SD
1	44.7902	54.9437	48.4179	248.835	305.243	268.988	274.355	28.5845
2	106.565	82.7647	93.2689	592.029	459.804	518.161	523.331	66.2641
5	145.475	127.006	136.726	808.194	705.591	759.588	757.791	51.3251
10	198.261	189.052	193.342	1101.45	1050.29	1074.12	1075.29	25.6027
20	257.023	256.055	254.896	1427.9	1422.53	1416.09	1422.17	5.91505
50	235.464	237.526	236.648	1308.13	1319.59	1314.71	1314.14	5.74827
*14- 0.24	nM			pmol/min/nmol			mean	SD
1	53.2856	62.6786	58.382	296.031	348.215	324.345	322.863	26.1233
2	101.761	90.6429	95.137	565.337	503.572	528.539	532.483	31.0707
5	143.878	160.77	150.877	799.32	893.165	838.205	843.564	47.1514
10	248.439	248.109	247.377	1380.22	1378.39	1374.32	1377.64	3.02003
20	365.228	371.545	363.486	2029.05	2064.14	2019.37	2037.52	23.5581
50	360.389	372.183	368.656	2002.16	2067.68	2048.09	2039.31	33.6324
*18- 0.12	nM			pmol/min/nmol			mean	SD
1	64.1607	66.1275	65.5629	712.897	734.75	728.477	725.375	11.2521
2	110.601	118.475	114.57	1228.9	1316.39	1273	1272.76	43.7427
5	157.989	165.295	161.097	1755.44	1836.61	1789.97	1794	40.7356
10	199.332	214.201	206.737	2214.8	2380.01	2297.08	2297.3	82.6067
20	219.382	216.78	217.974	2437.58	2408.67	2421.93	2422.73	14.4729
50	201.537	191.165	198.563	2239.3	2124.06	2206.25	2189.87	59.341
*24- 0.3	nM			pmol/min/nmol			mean	SD
1	2.62881	2.23018	2.47414	11.6836	9.91191	10.9962	10.8639	0.893227
2	3.97718	3.89198	3.64719	17.6764	17.2977	16.2097	17.0613	0.761364
5	5.43647	5.49048	5.5248	24.1621	24.4021	24.5547	24.373	0.197916
10	6.03547	6.29433	6.946	26.8243	27.9748	30.8711	28.5567	2.08521
20	7.06967	7.14211	8.832	31.4208	31.7427	39.2533	34.1389	4.43212
50	9.9719	9.32126	9.61467	44.3195	41.4278	42.7319	42.8264	1.44817
